# Supplementary material for: Structure of mouse protocadherin 15 of the stereocilia tip link in complex with LHFPL5
Source: eLife journal article supplement (doi:10.7554/elife.38770), 2018-08-02
Supplement: supp [file elife-38770-supp-v1.zip]

Archive with 11 entries (11 files):
- elife_poa_e38770_Video_1.mov
- elife_poa_e38770_Figure_4_figure_supplement_2.pdf
- elife_poa_e38770_Figure_3_figure_supplement_1.pdf
- elife_poa_e38770_Figure_2_figure_supplement_1.pdf
- elife_poa_e38770_Video_2.mov
- elife_poa_e38770_Figure_5_figure_supplement_1.pdf
- elife_poa_e38770_Transparent_Reporting_File.pdf
- elife_poa_e38770_Figure_4_figure_supplement_1.pdf
- elife_poa_e38770_Video_3.mov
- elife_poa_e38770_Figure_1_figure_supplement_1.pdf
- elife_poa_e38770_Figure_2_figure_supplement_2.pdf
