# Supplementary figures and images for: Structure of mouse protocadherin 15 of the stereocilia tip link in complex with LHFPL5
Source: eLife journal article supplement (doi:10.7554/elife.38770), 2018-08-02

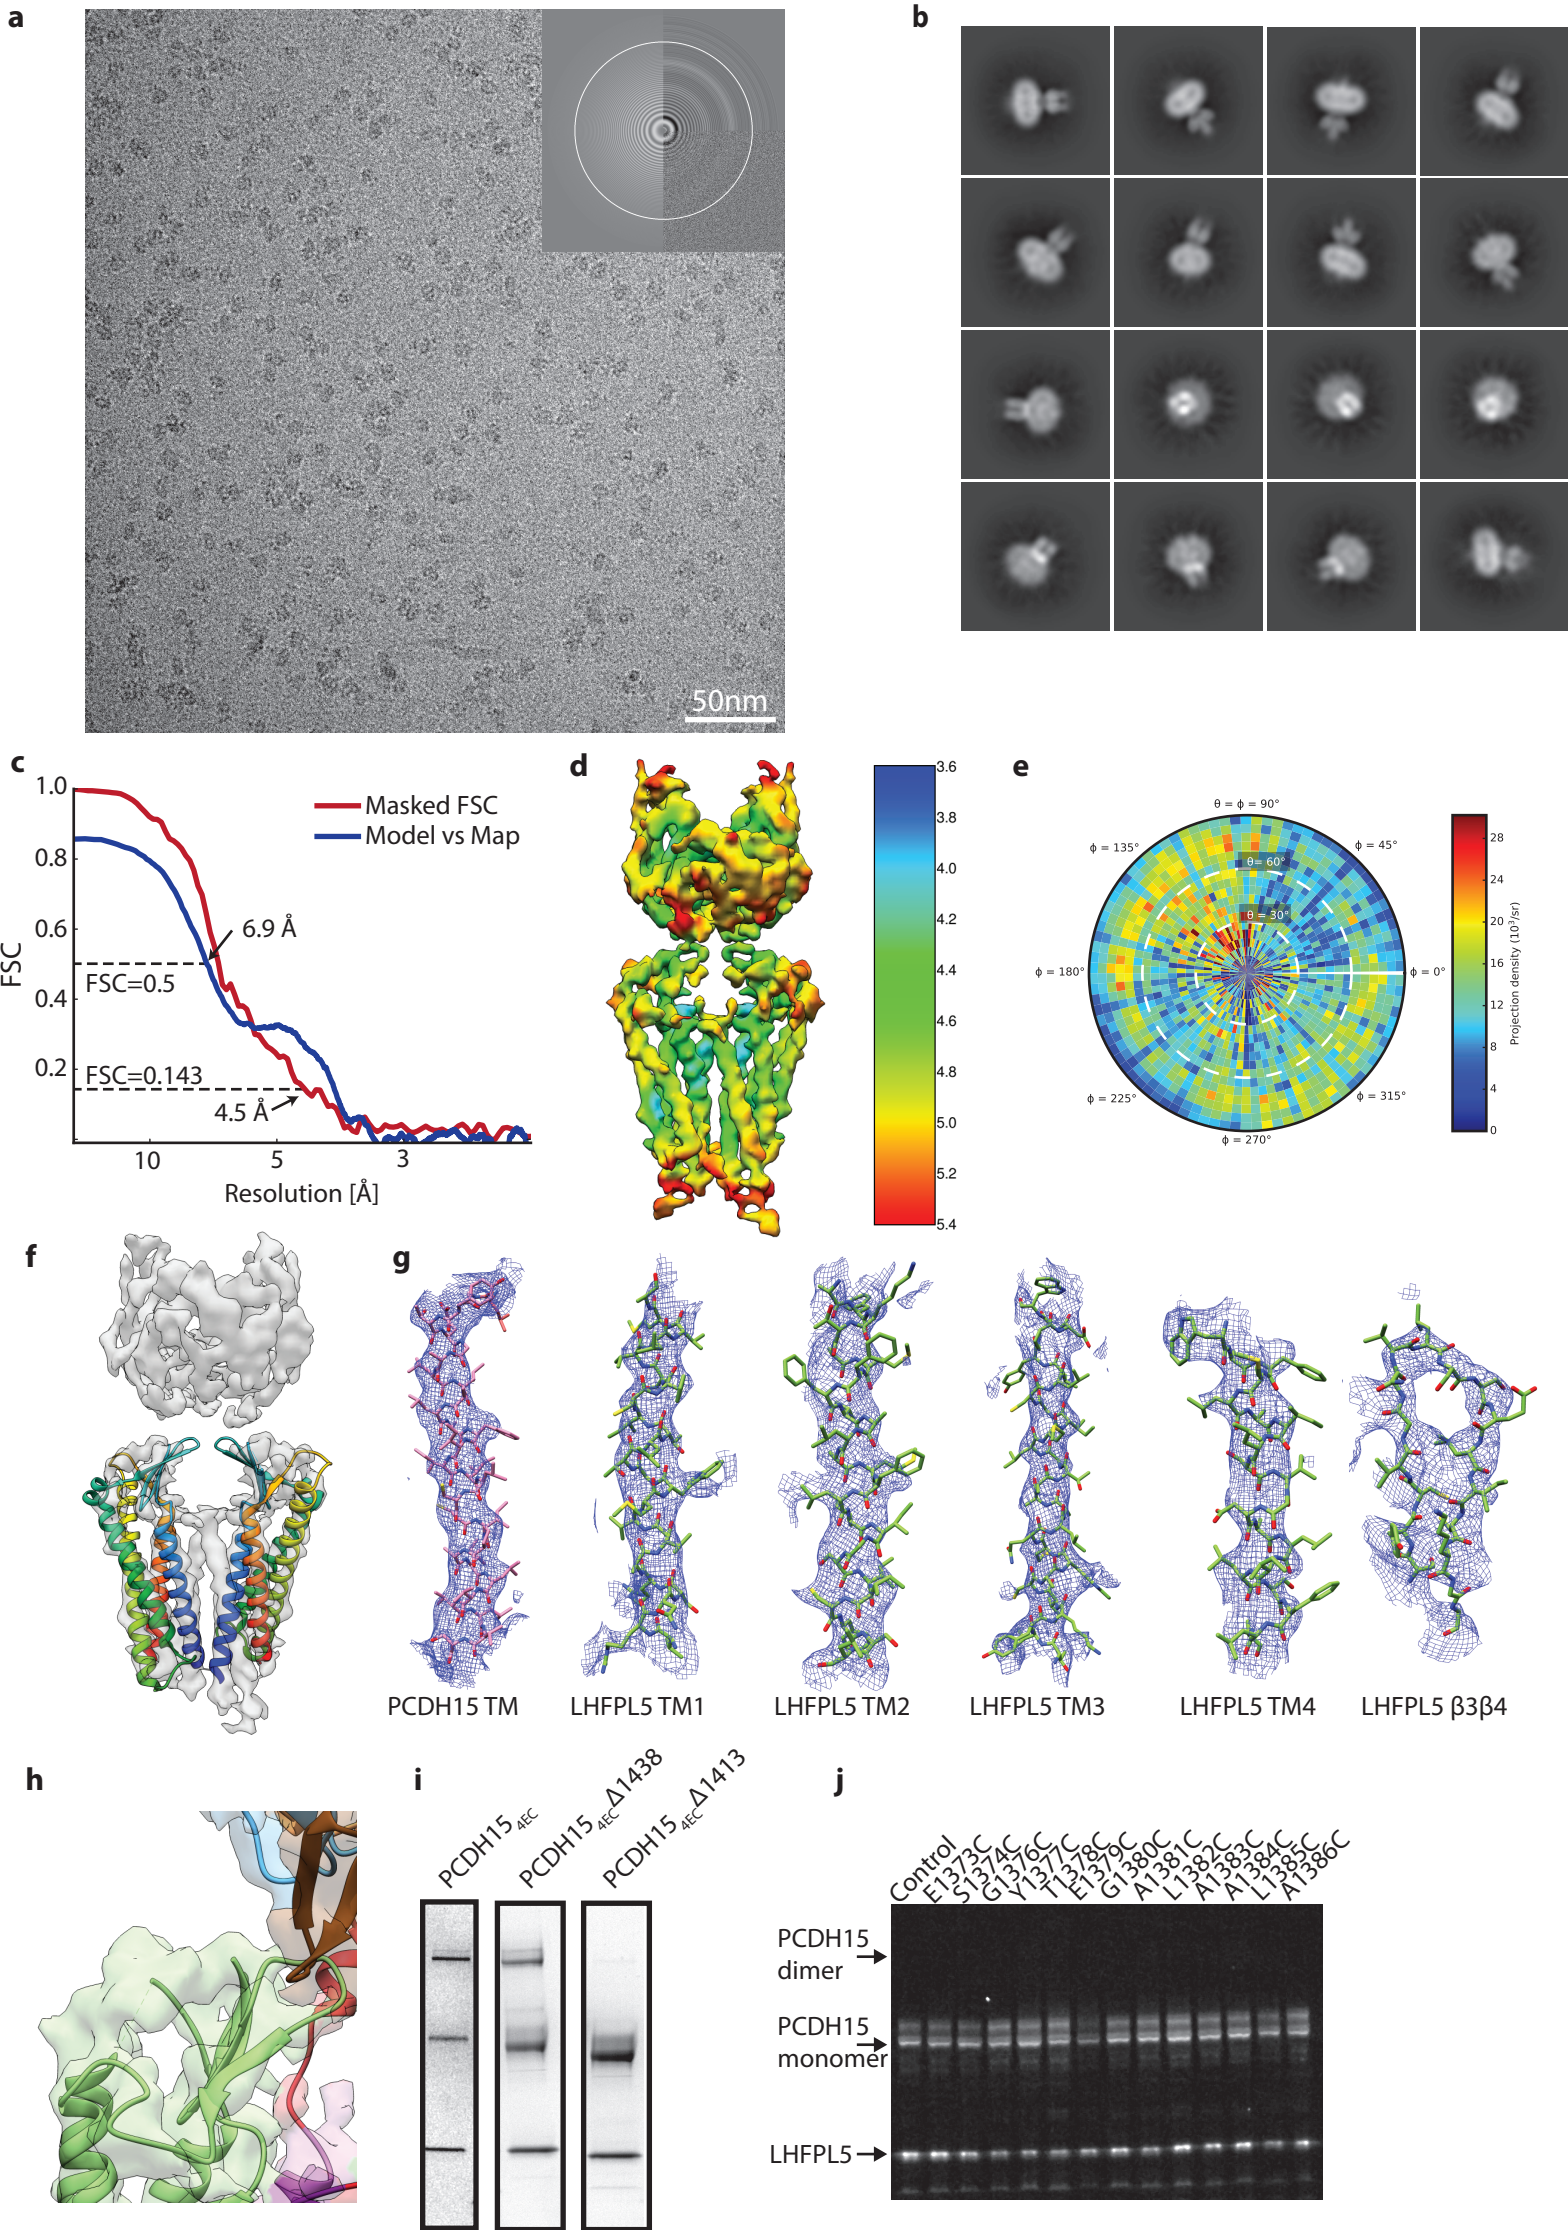

Supplement: supp [file elife-38770-supp-v1.zip]

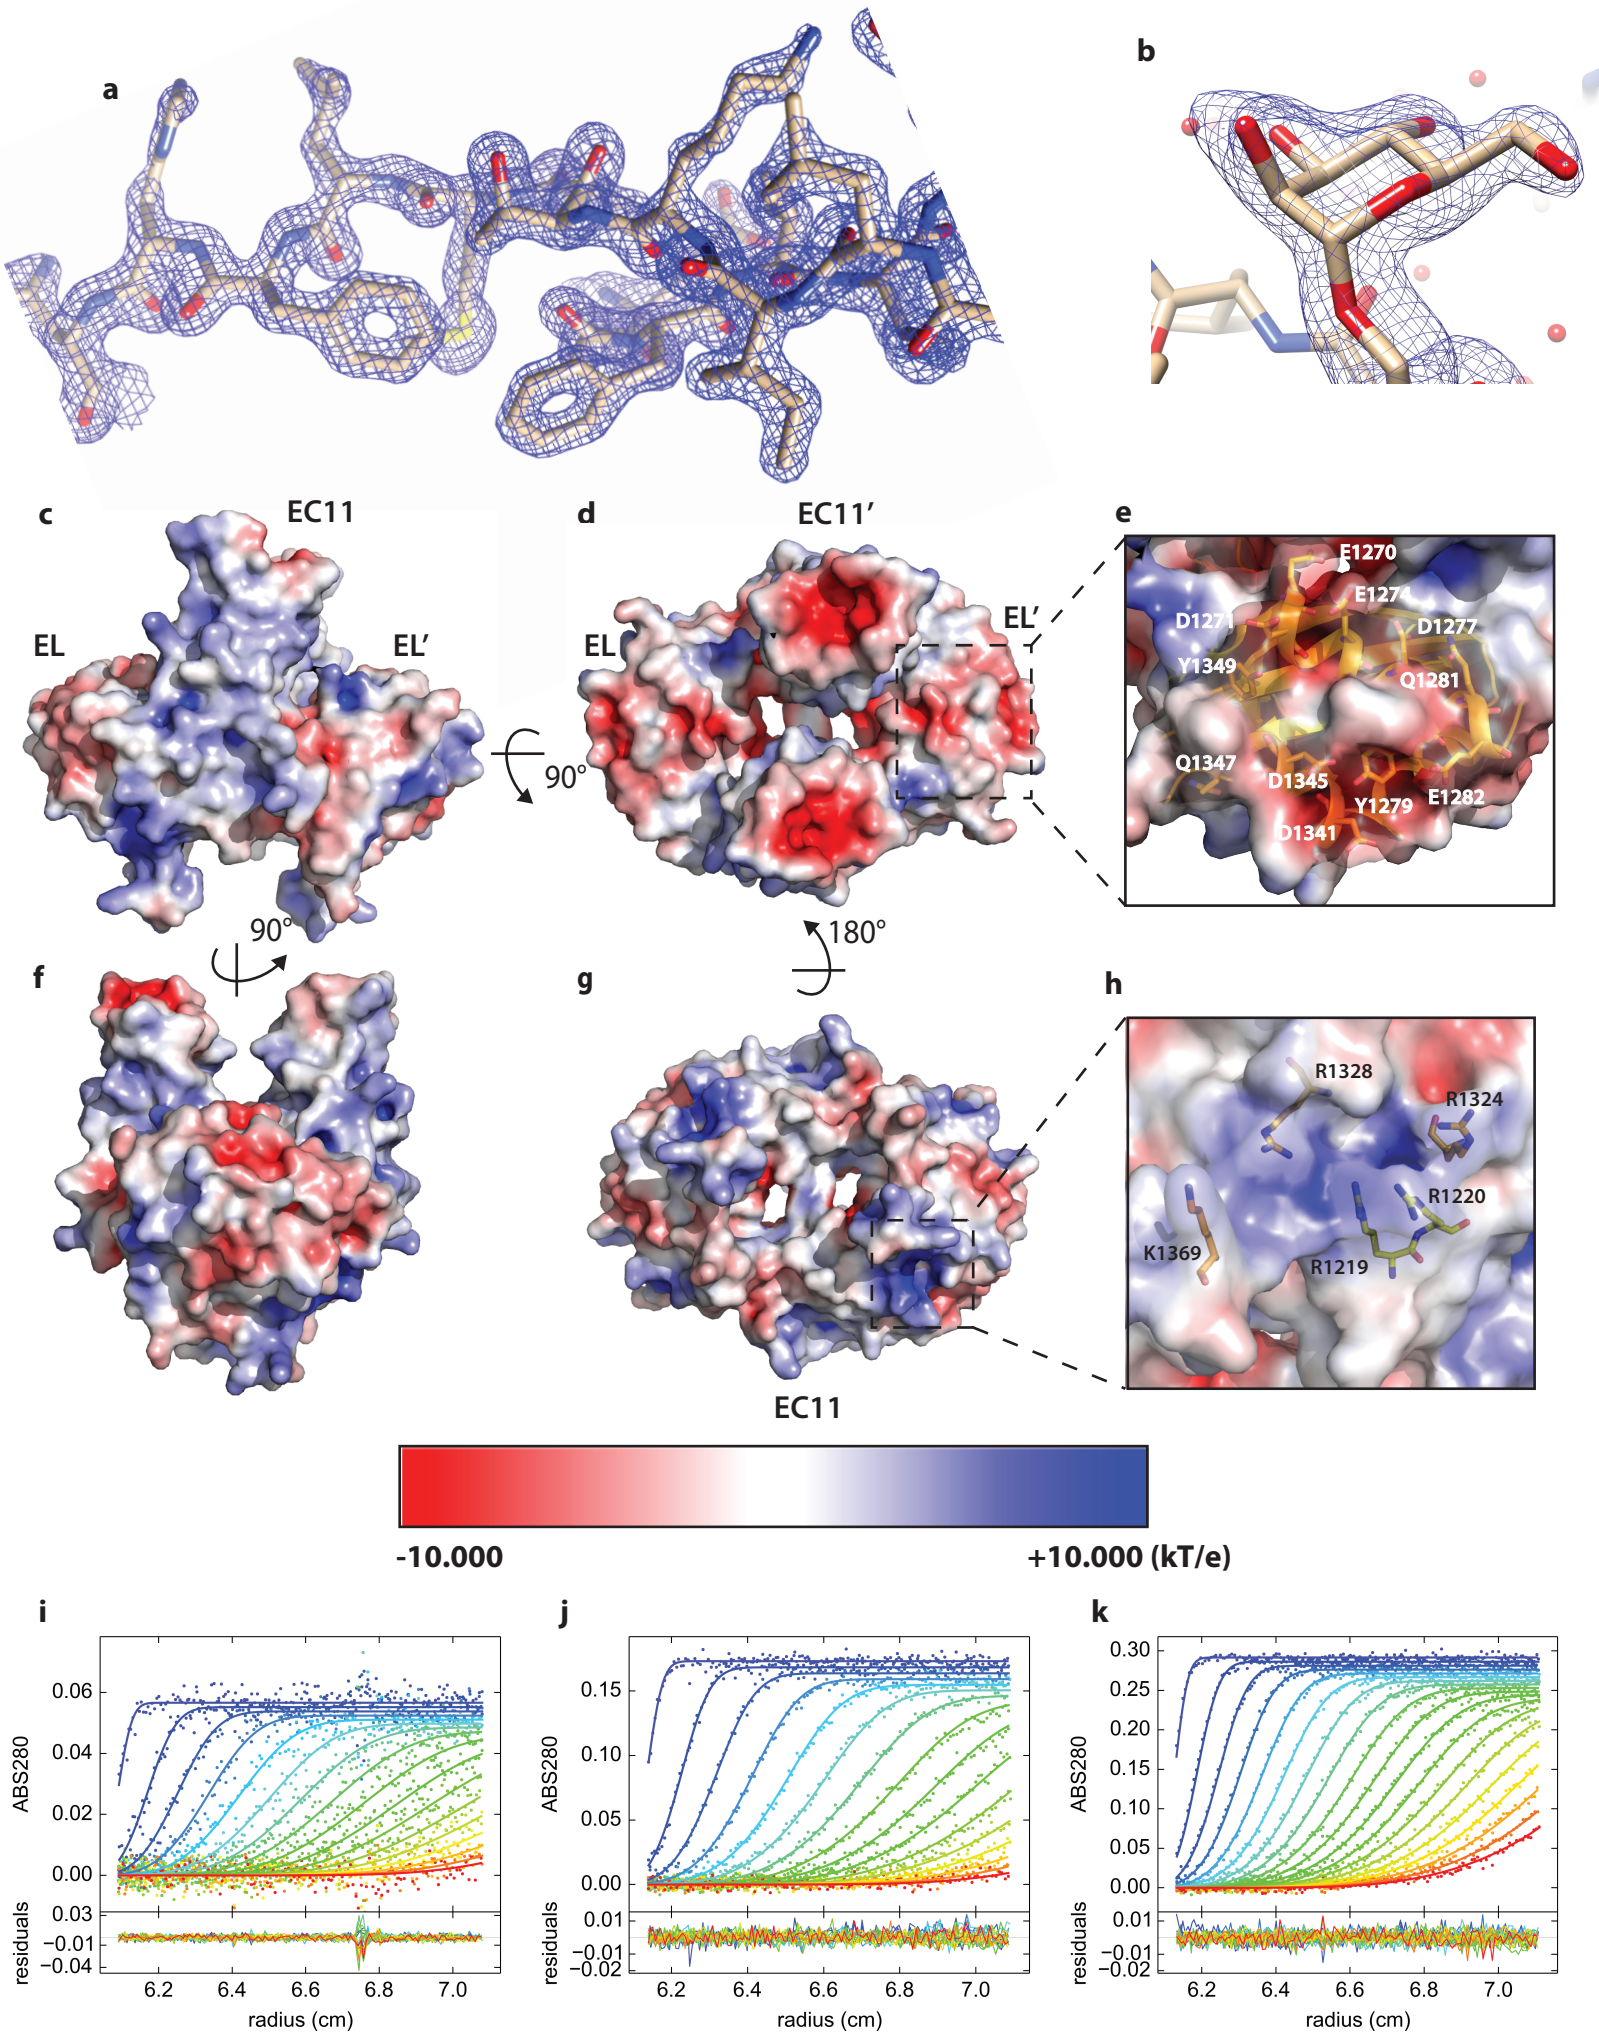

Figure 3 - supplement 1

Supplement: supp [file elife-38770-supp-v1.zip]

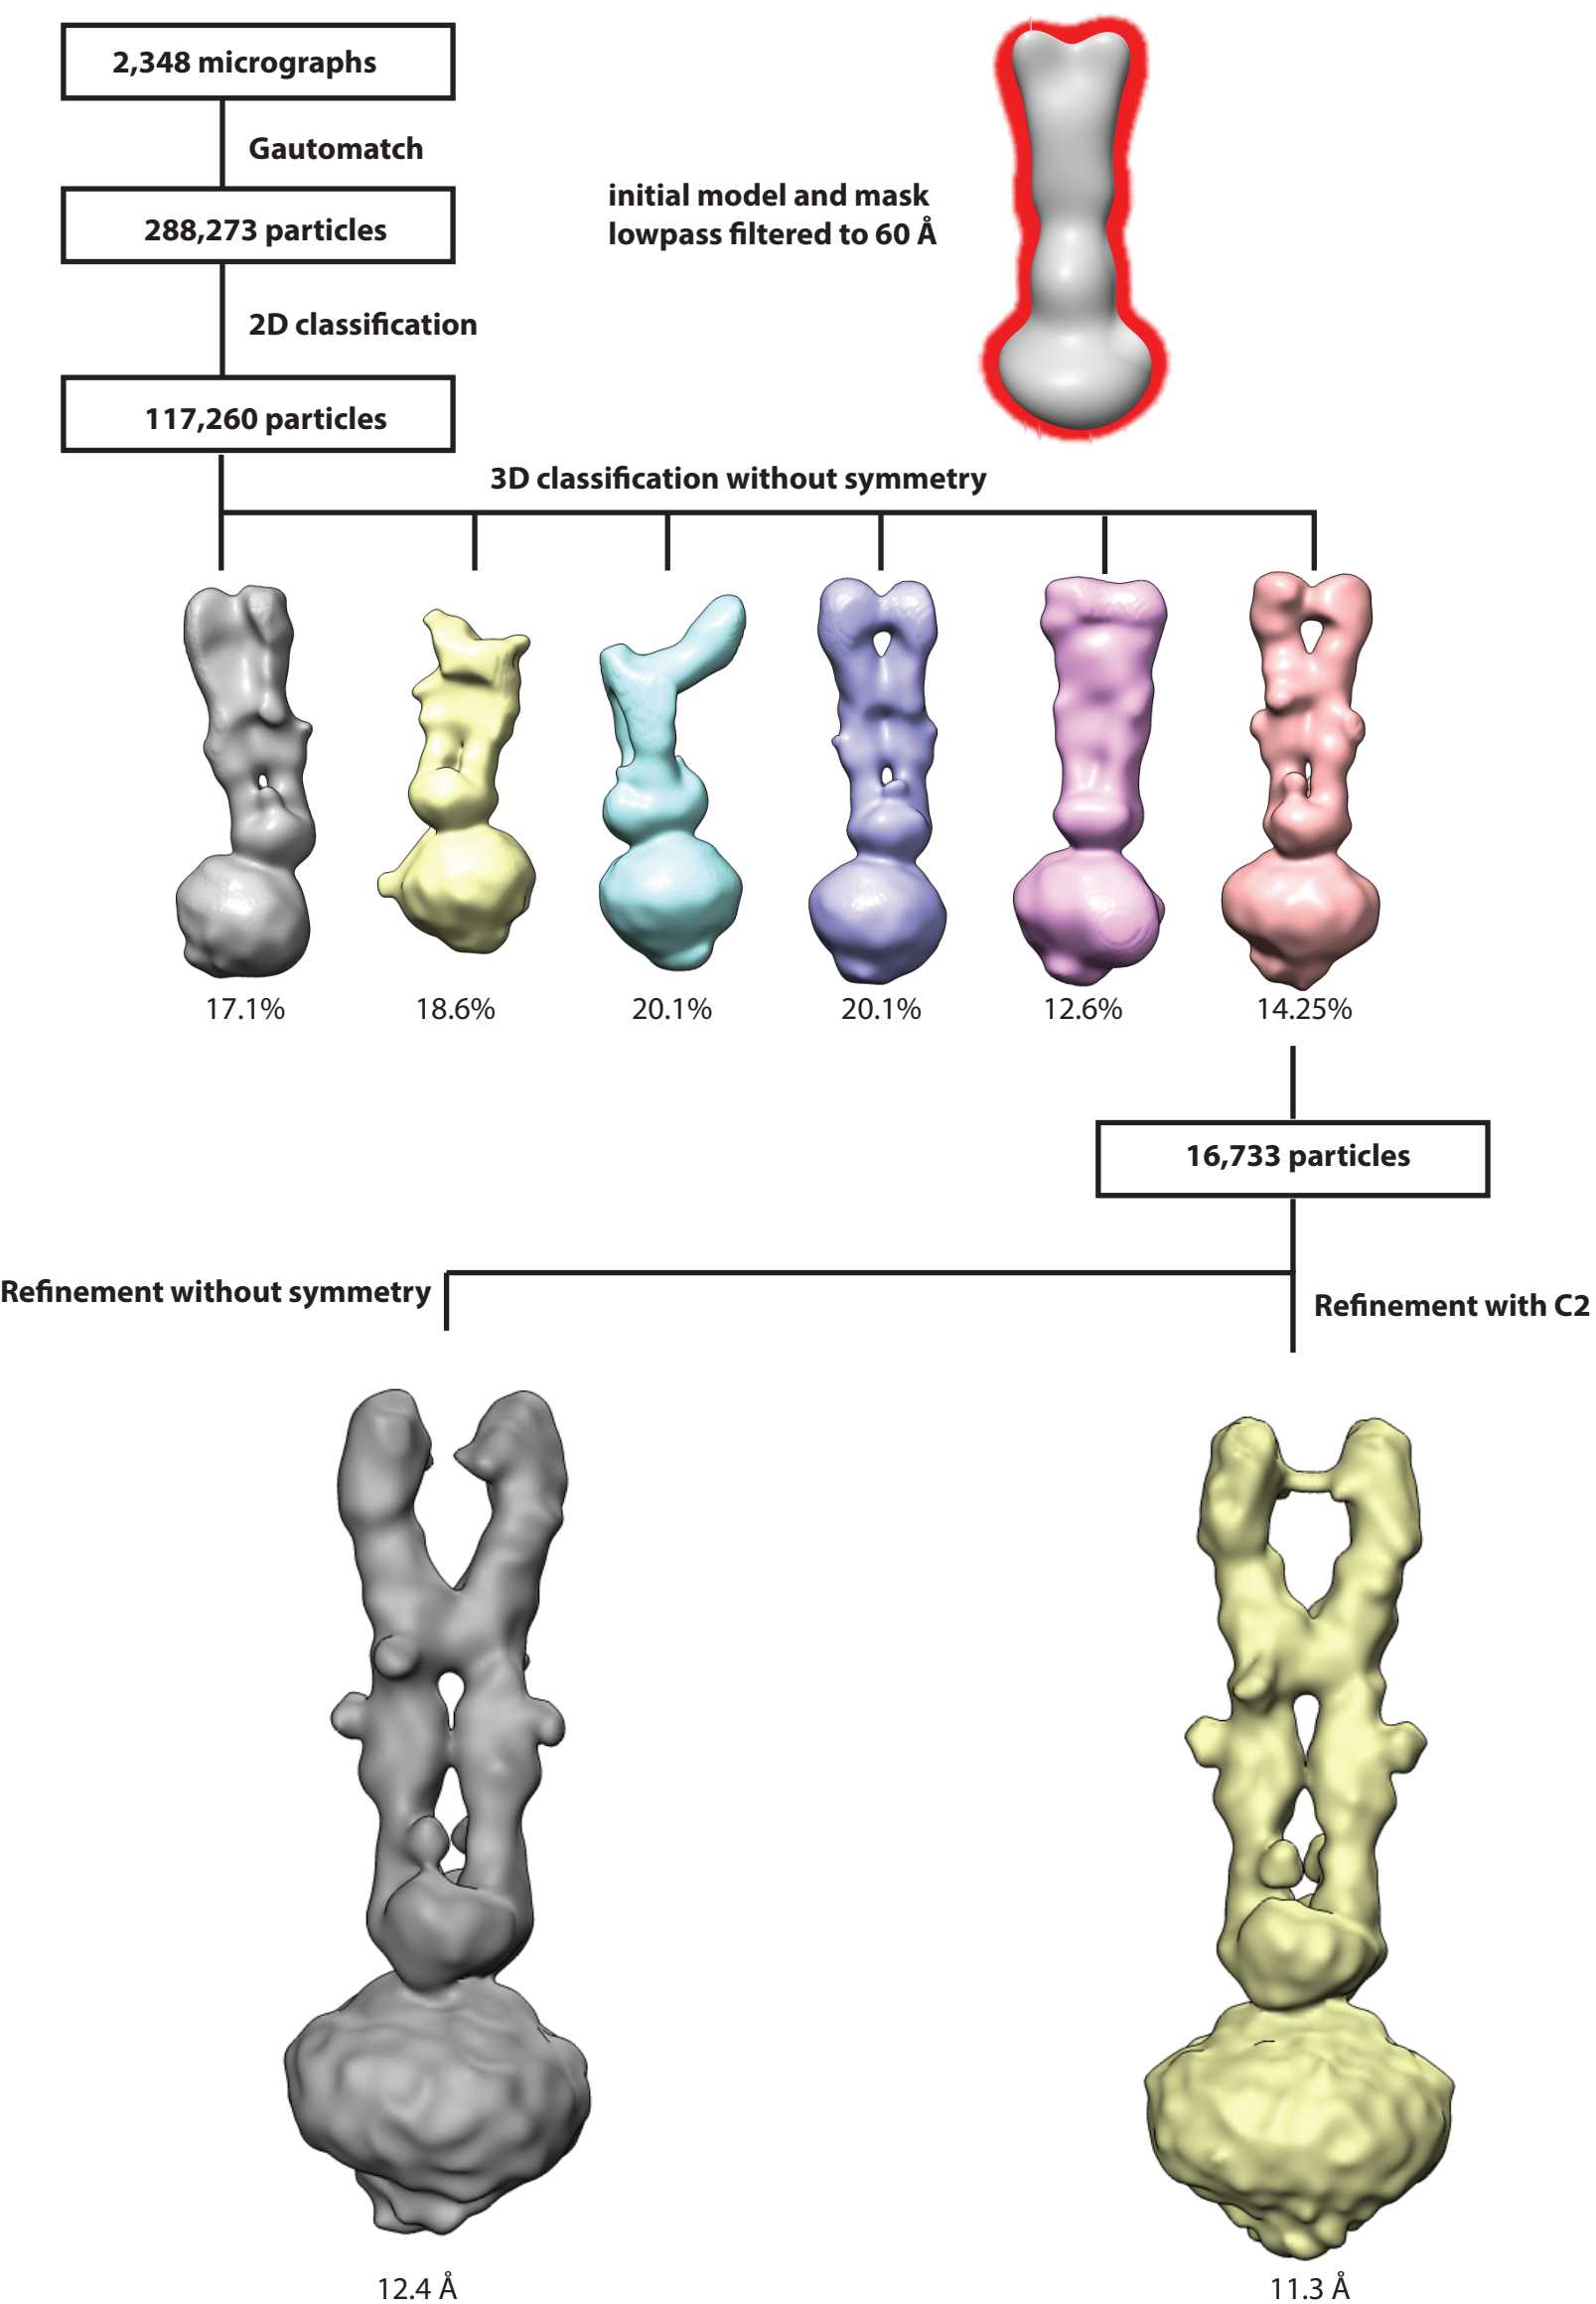

Figure 2 - supplement 1

Supplement: supp [file elife-38770-supp-v1.zip › elife_poa_e38770_Figure_2_figure_supplement_1.pdf]

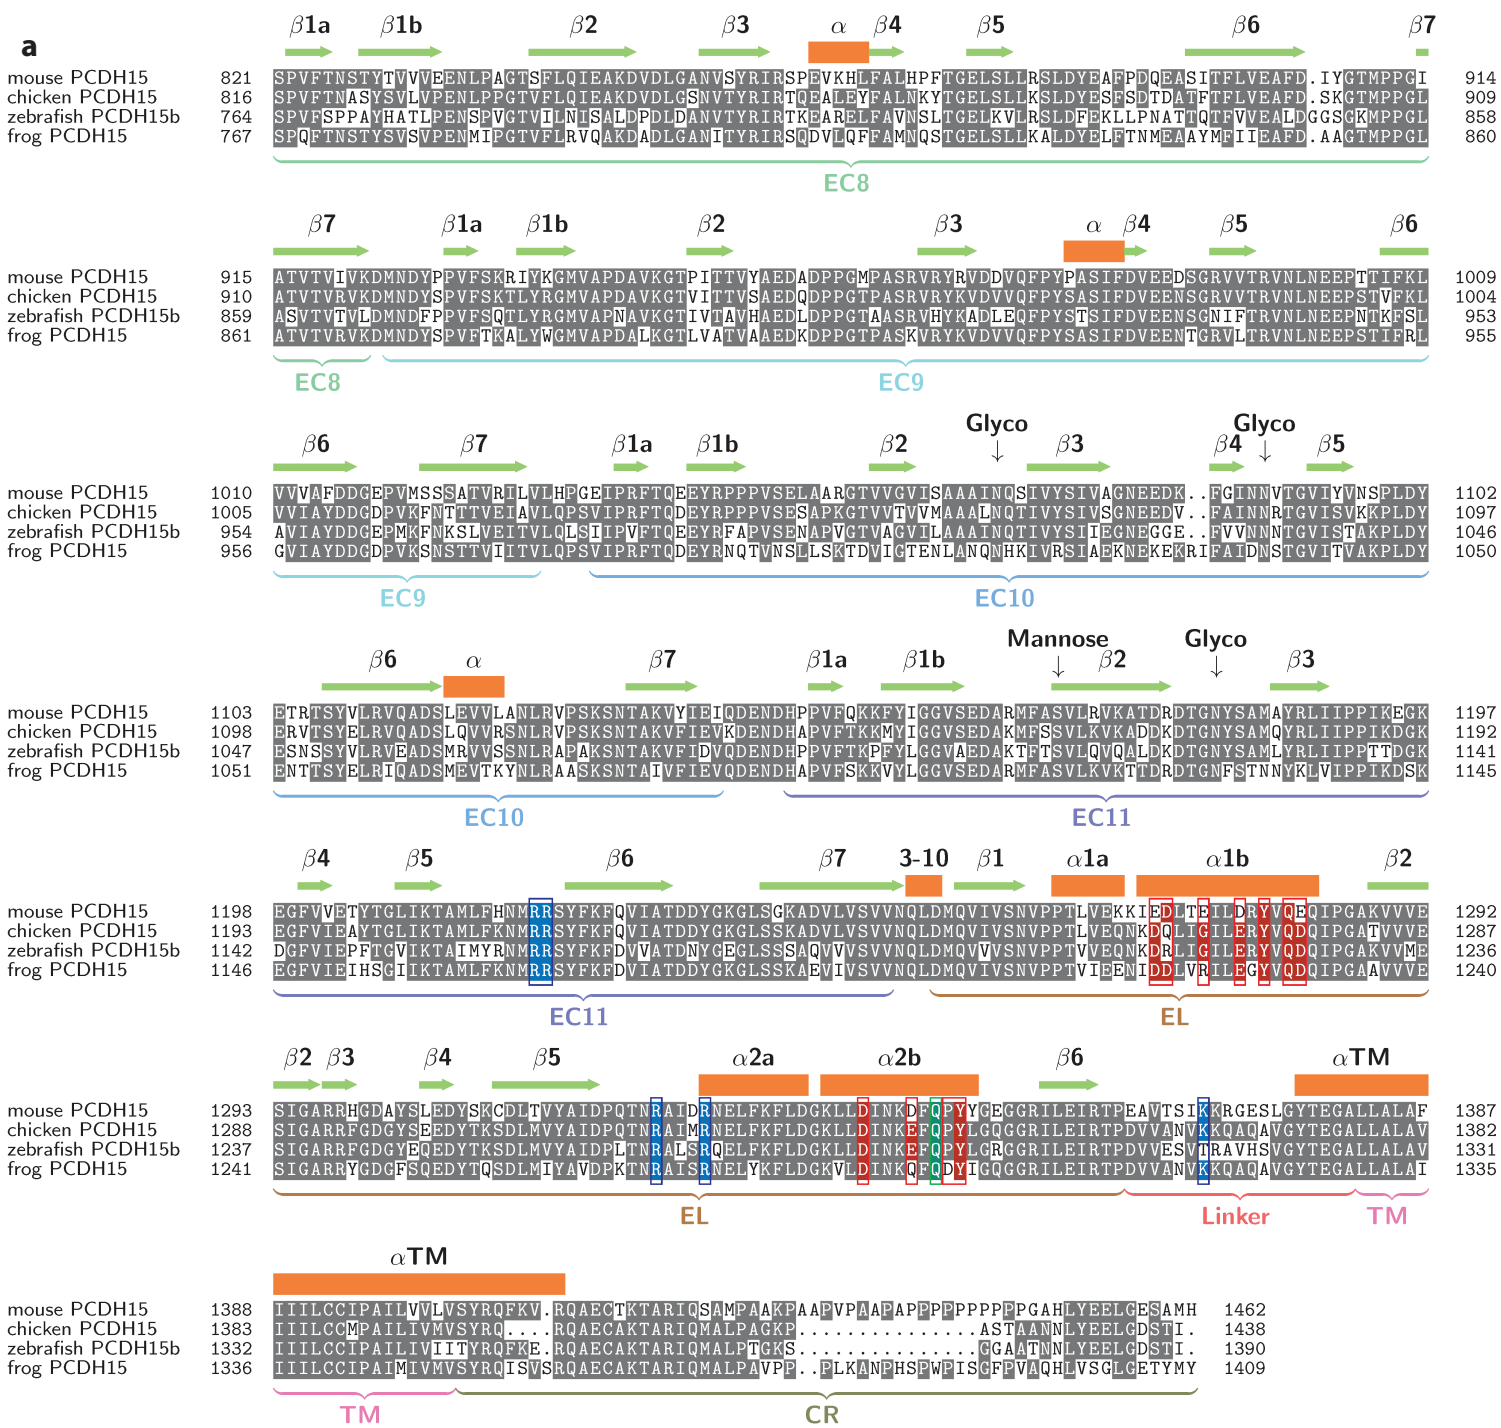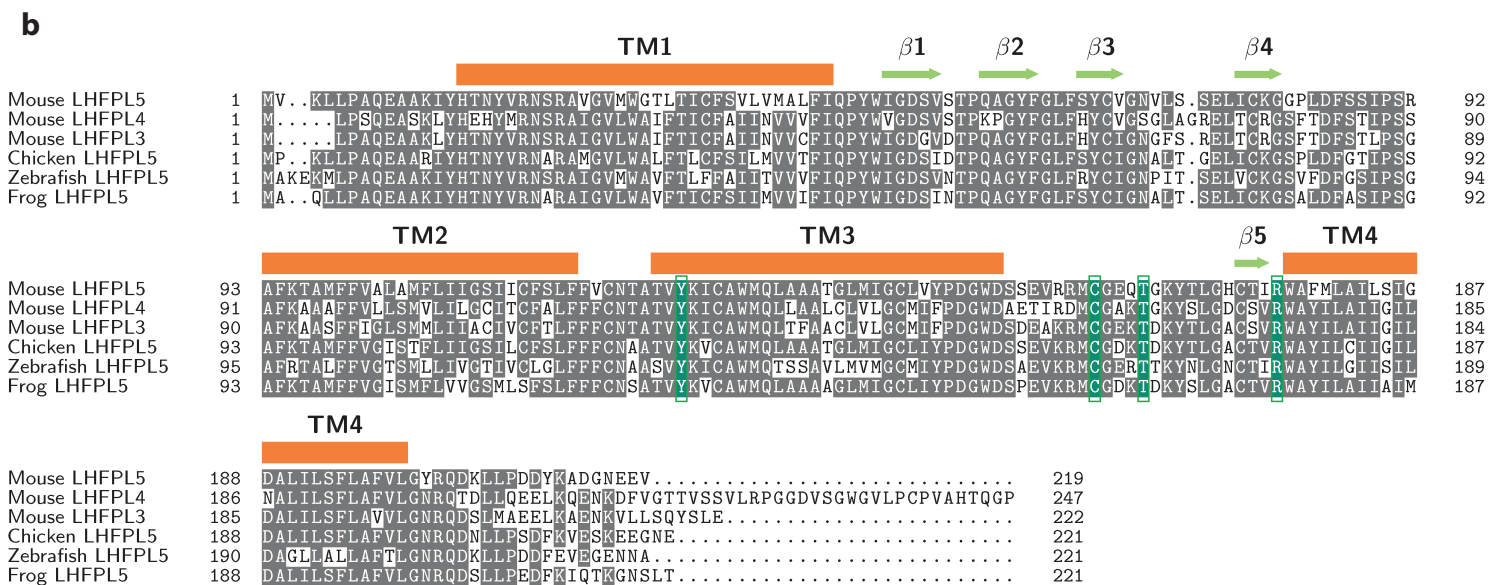

Figure 5 - supplement 1

Supplement: supp [file elife-38770-supp-v1.zip › elife_poa_e38770_Figure_5_figure_supplement_1.pdf]

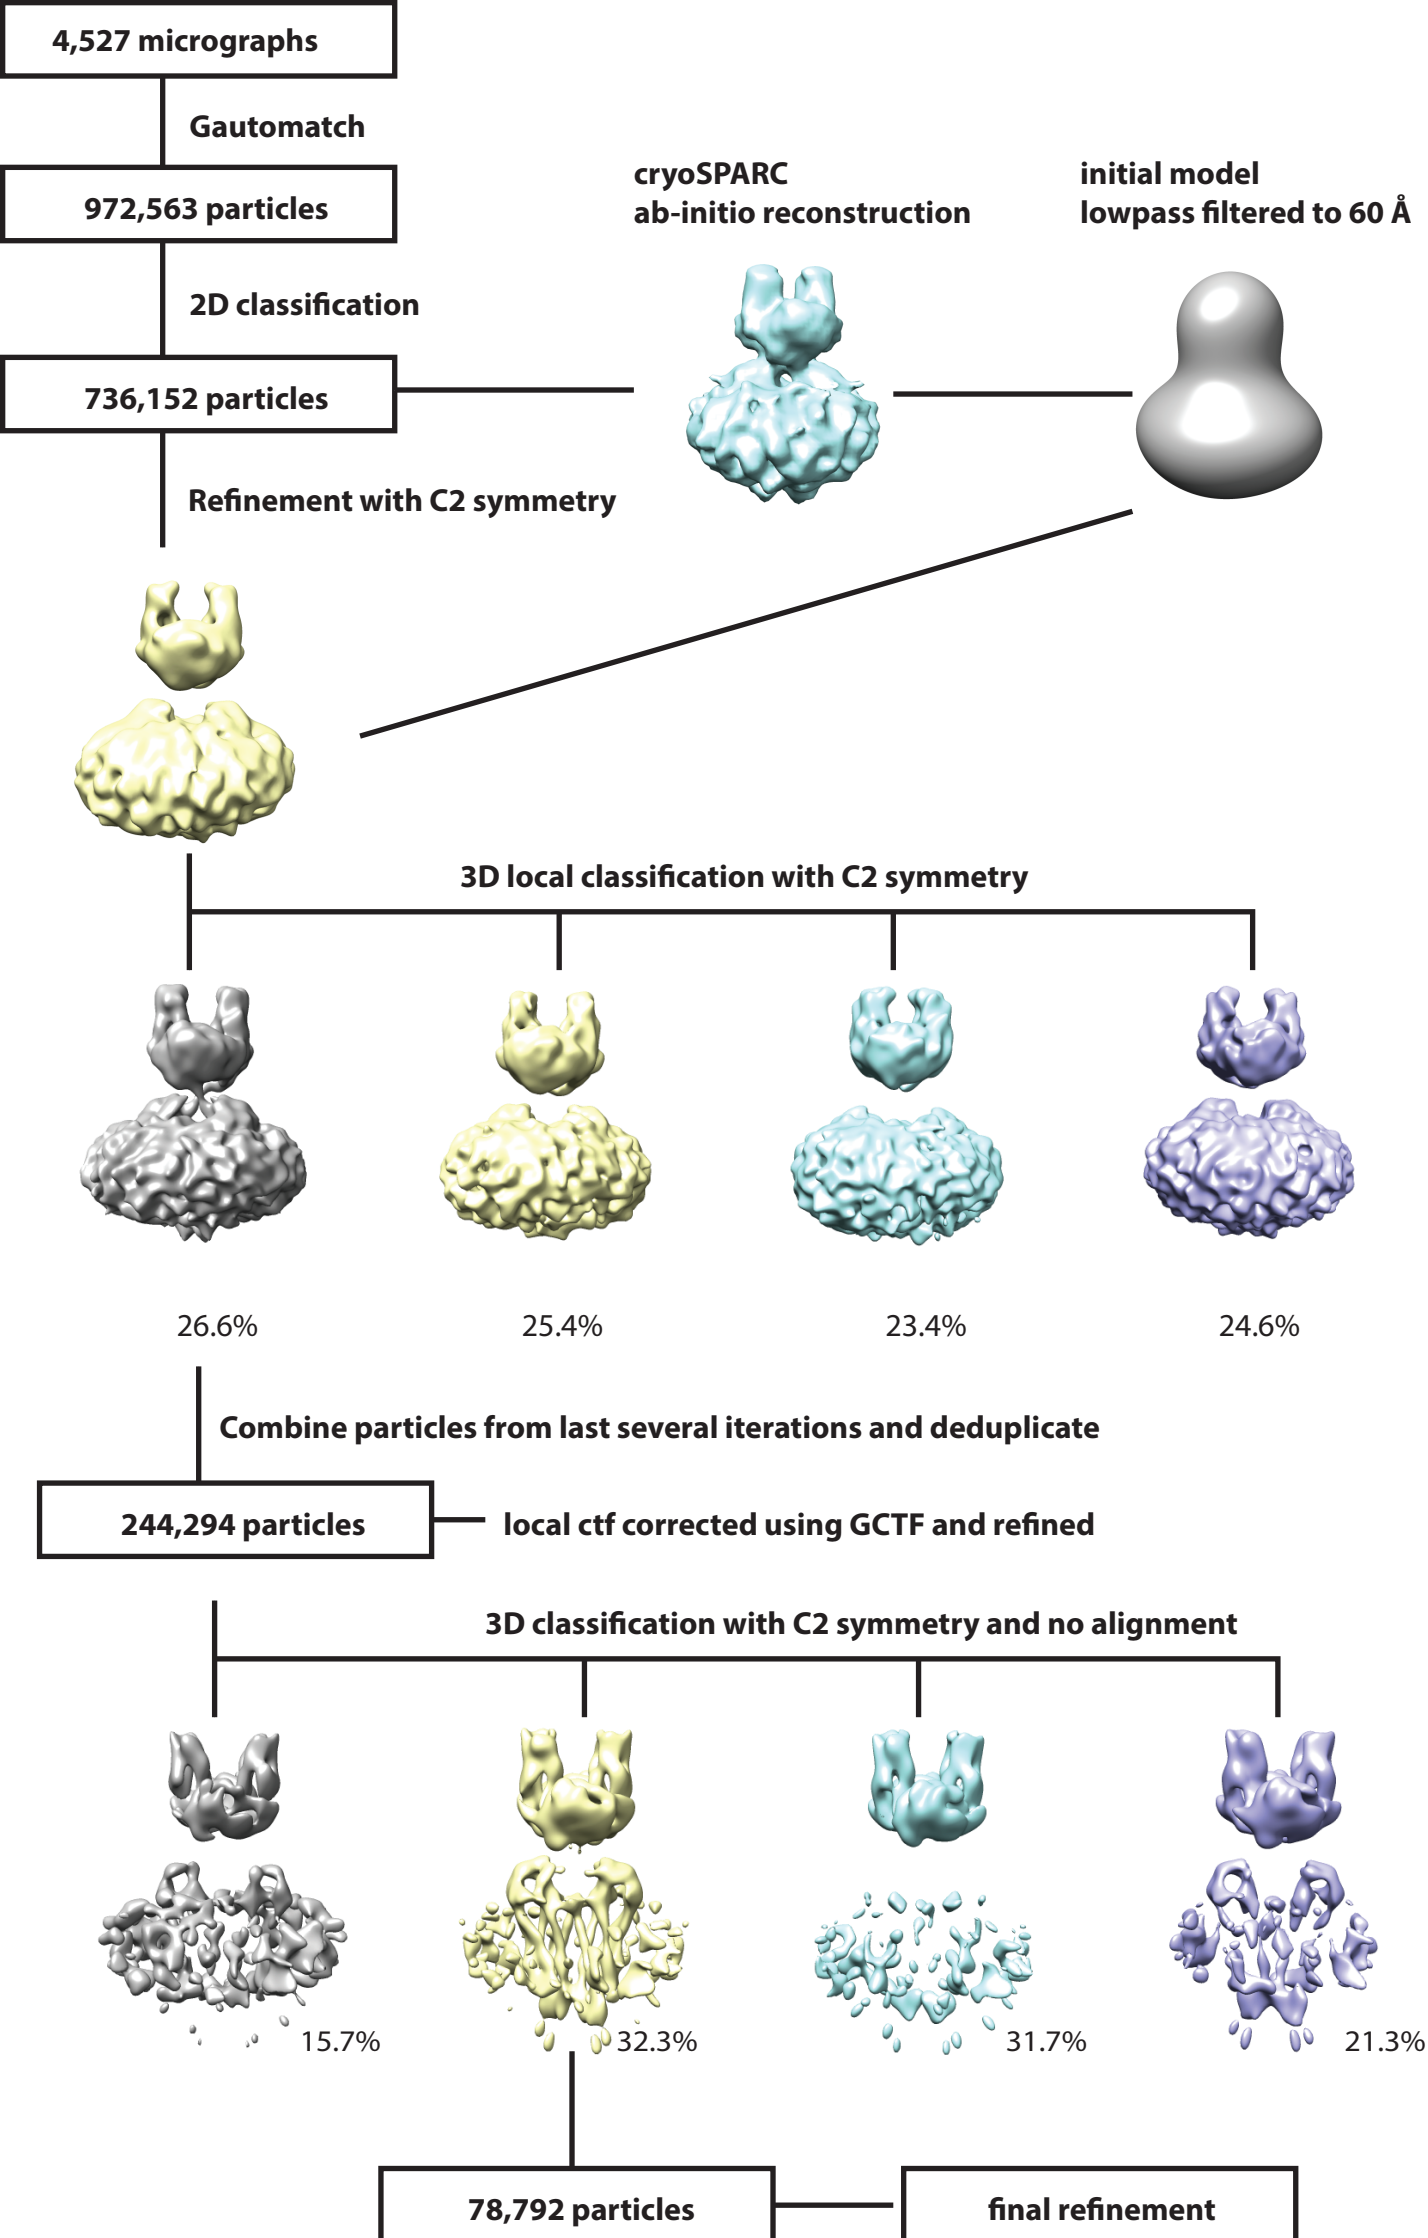

Figure 4 - supplement 1

Supplement: supp [file elife-38770-supp-v1.zip › elife_poa_e38770_Figure_4_figure_supplement_1.pdf]

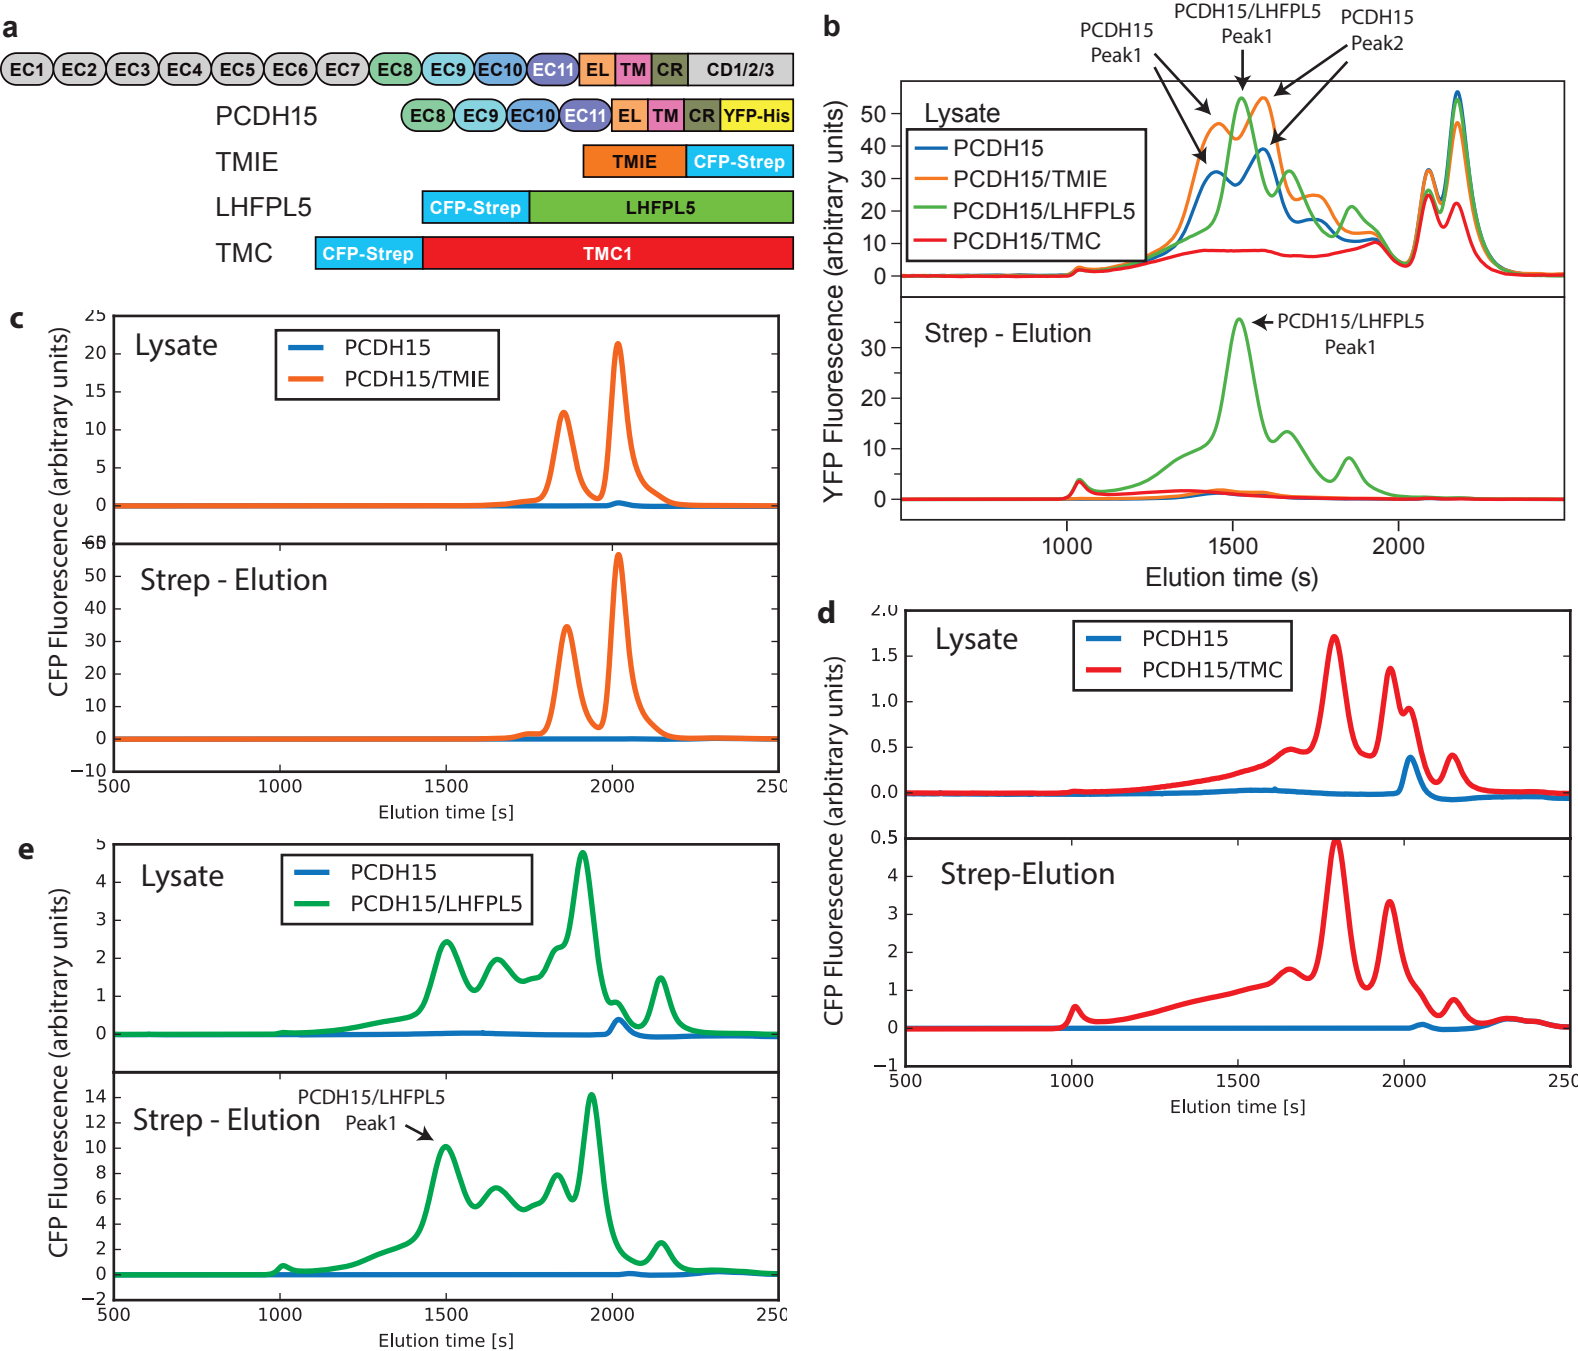

Figure 1 - supplement 1

Supplement: supp [file elife-38770-supp-v1.zip › elife_poa_e38770_Figure_1_figure_supplement_1.pdf]

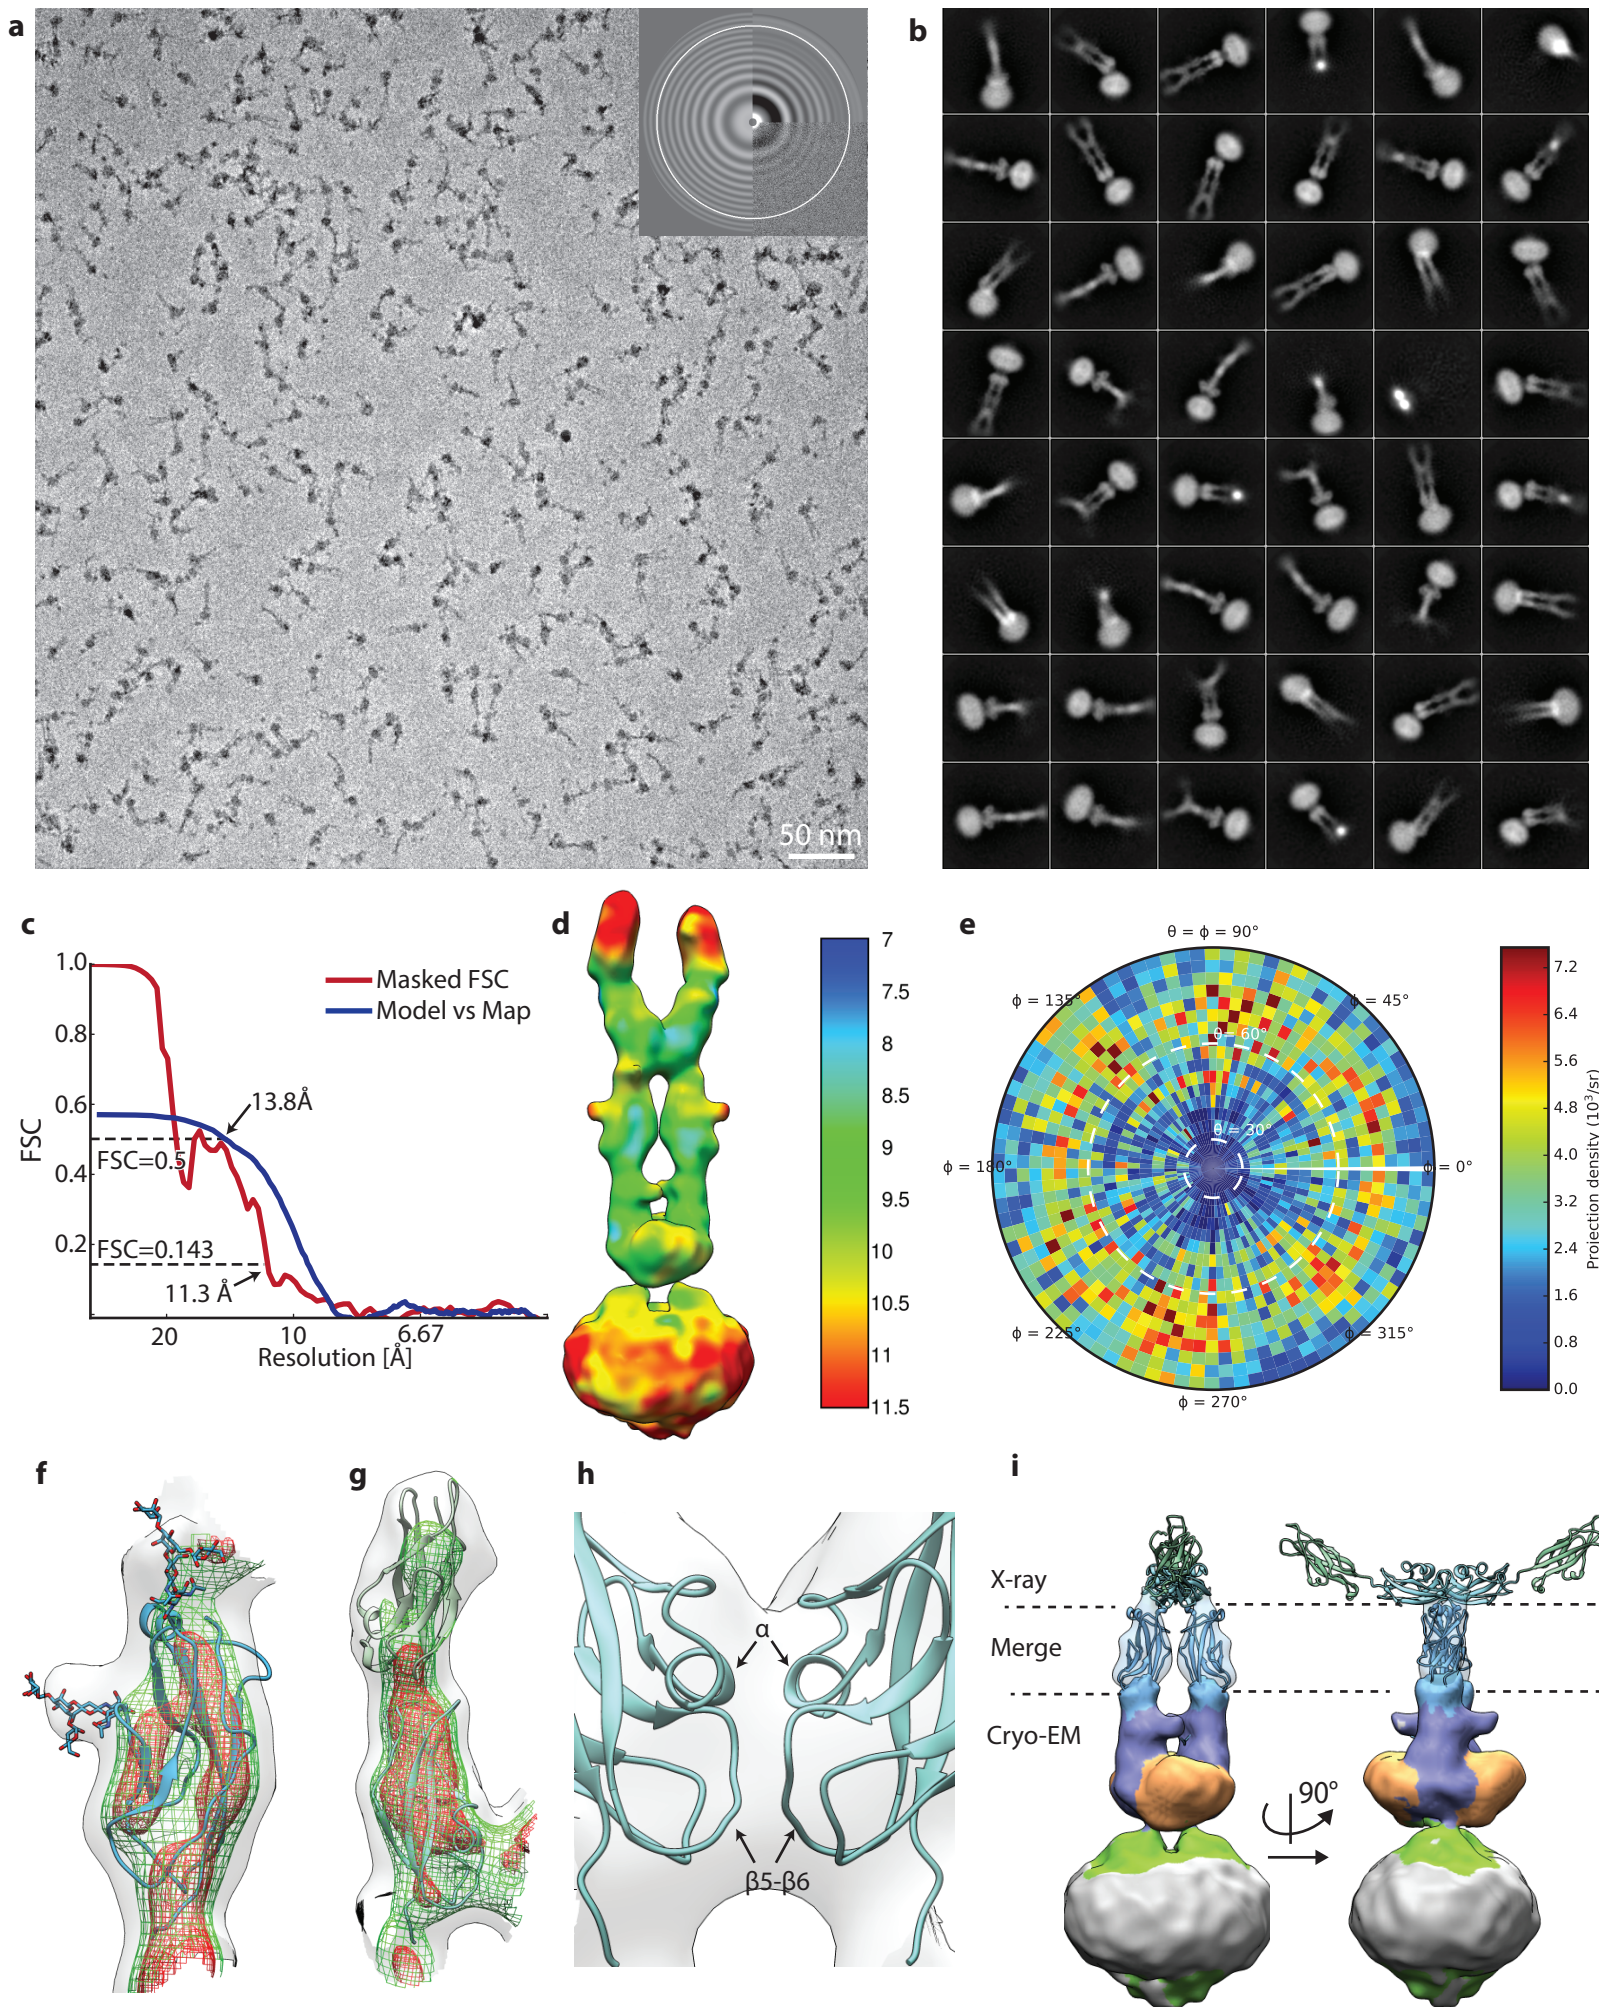

Figure 2 - supplement 2

Supplement: supp [file elife-38770-supp-v1.zip › elife_poa_e38770_Figure_2_figure_supplement_2.pdf]
